# Supplementary material
Source: Springer Nature journal article supplement (https://www.springermedizin.de/resource/supplementary/13046_2011_479_MOESM5_ESM.pdf/9662326)

**A**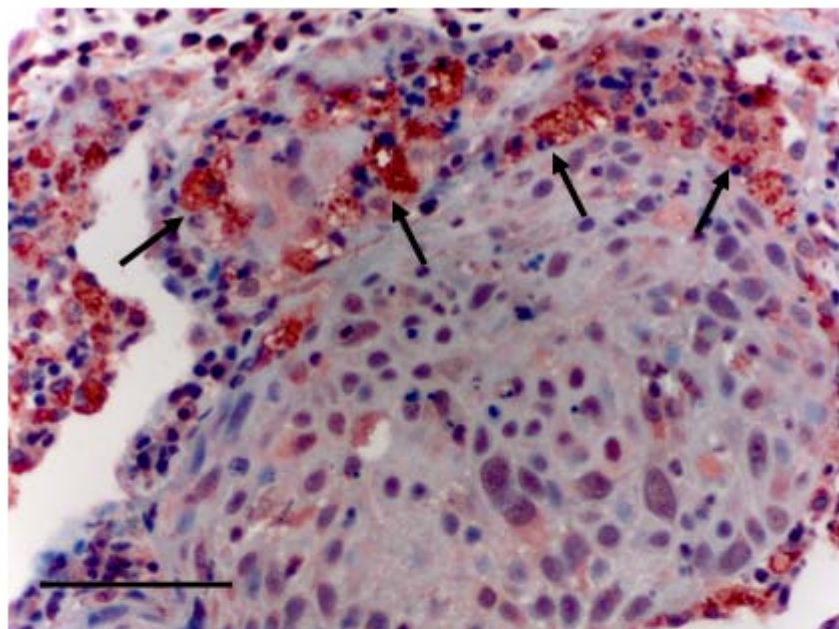**B**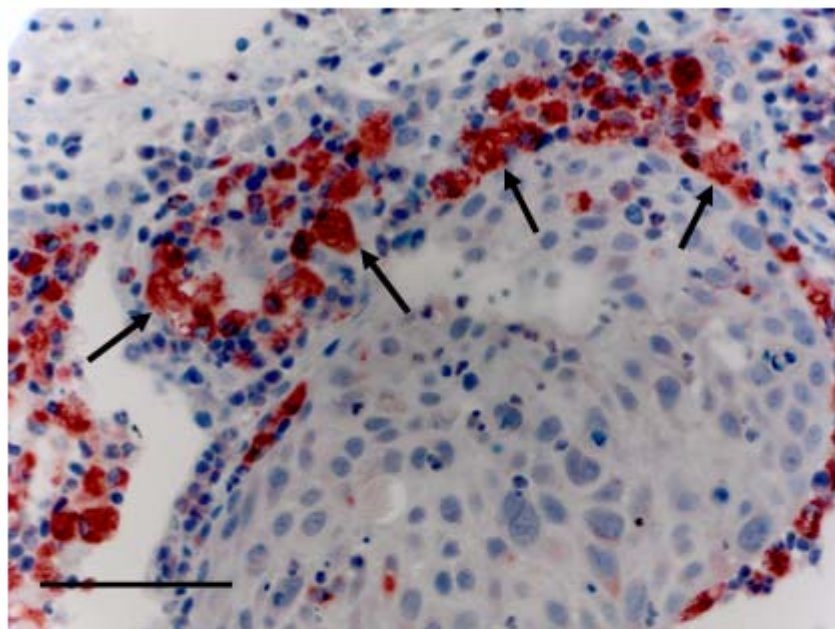**C**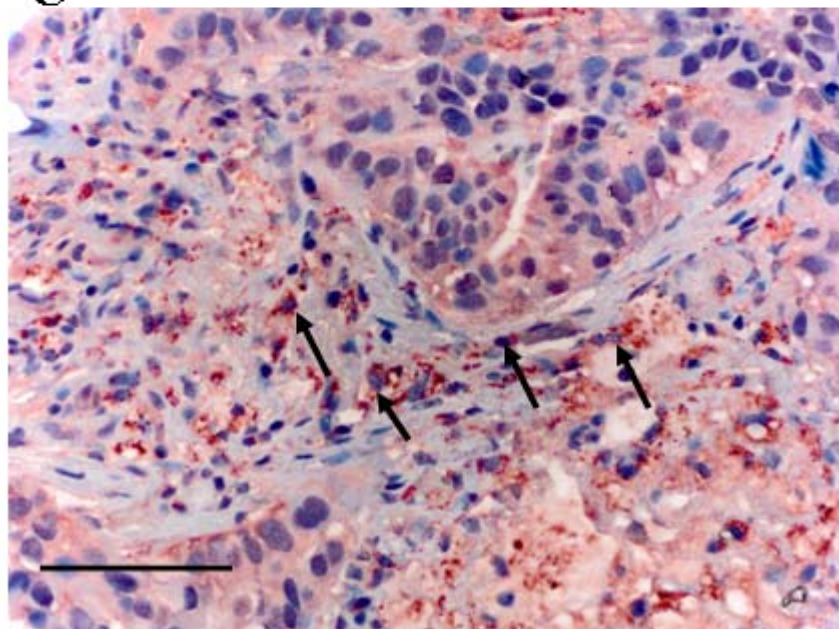**D**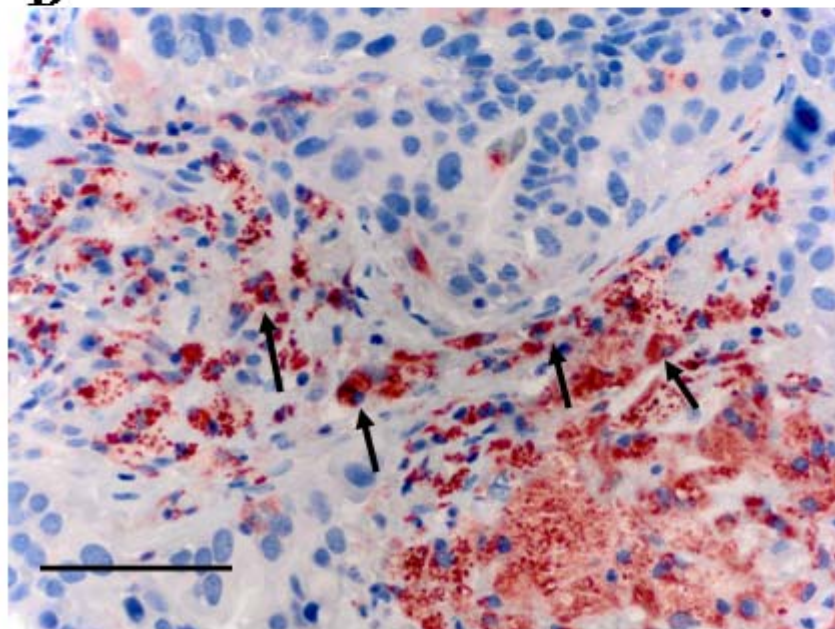

Supplement: MOESM5 [file 9662326]
